# Supplementary material for: Long-term regional trends of nitrogen and sulfur deposition in the United States from 2002 to 2017
Source: Copernicus journal article supplement (doi:10.5194/acp-22-12749-2022), 2022-09-30
Supplement: Supplementary file [file acp-22-12749-2022-supplement.pdf]

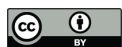

*Supplement of*

## **Long-term regional trends of nitrogen and sulfur deposition in the United States from 2002 to 2017**

**Sarah E. Benish et al.**

*Correspondence to:* Sarah E. Benish (benish.sarah@epa.gov) and Jesse O. Bash (bash.jesse@epa.gov)

The copyright of individual parts of the supplement might differ from the article licence.

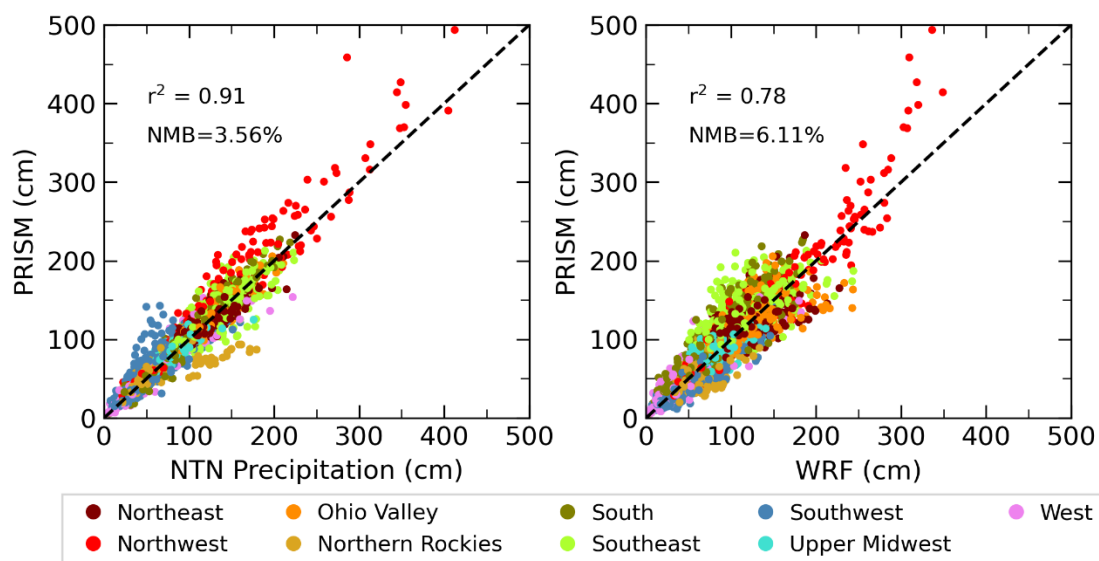

**Figure S1. Left:** Scatter plot of annual accumulated precipitation (cm) from PRISM and observed at selected NTN sites, colored by the NOAA climate region. **Right:** Scatter plot of annual accumulated precipitation (cm) modeled in CMAQ (WRF) and estimated from PRISM, colored by the NOAA climate region. The positive normalized mean bias indicates the PRISM precipitation amounts are larger than the NTN or WRF precipitation amounts.

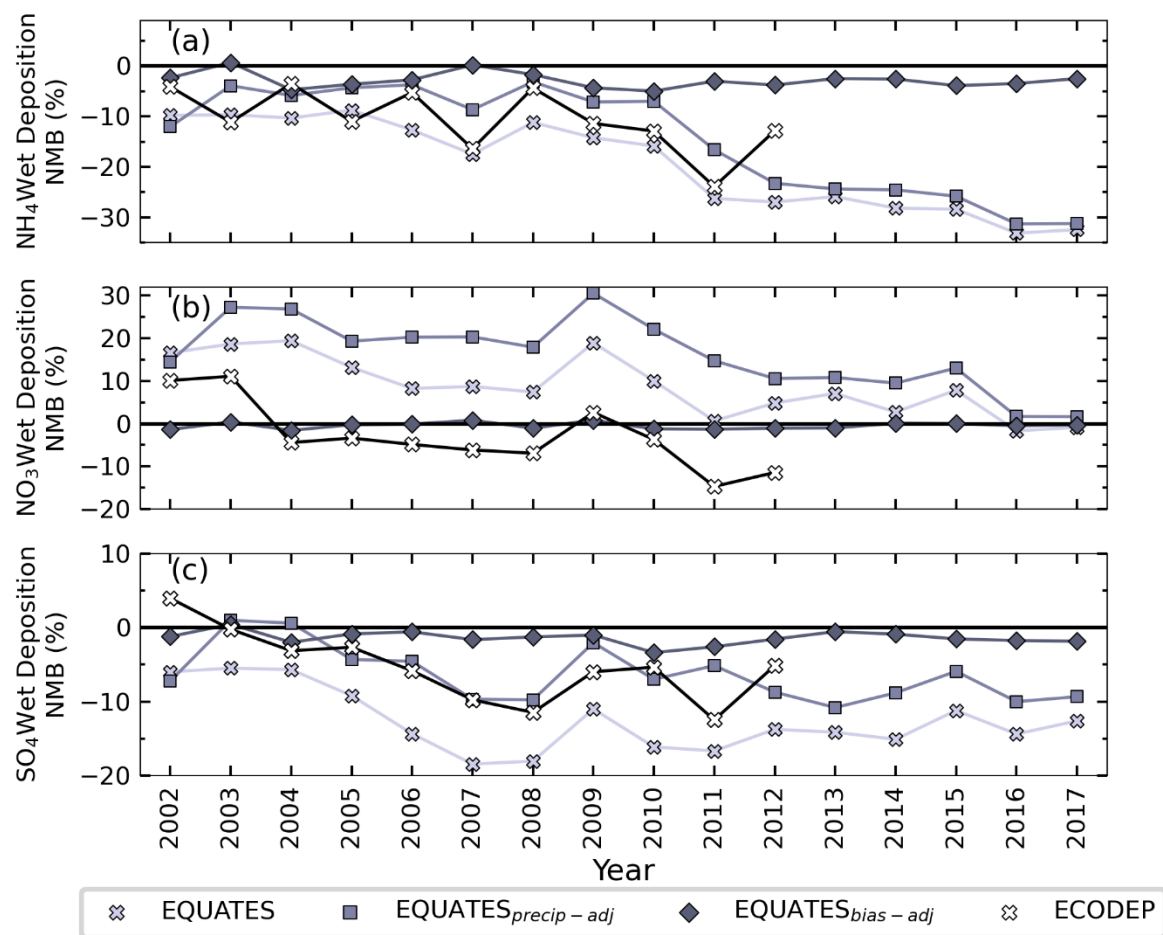

Figure S2. Annual normalized mean bias (NMB, %) for unadjusted, precipitation-adjusted, and bias-adjusted modeled  $\text{NH}_4$  (panel a),  $\text{NO}_3$  (panel b), and  $\text{SO}_4$  (panel c) wet deposition compared to NTN measurements.

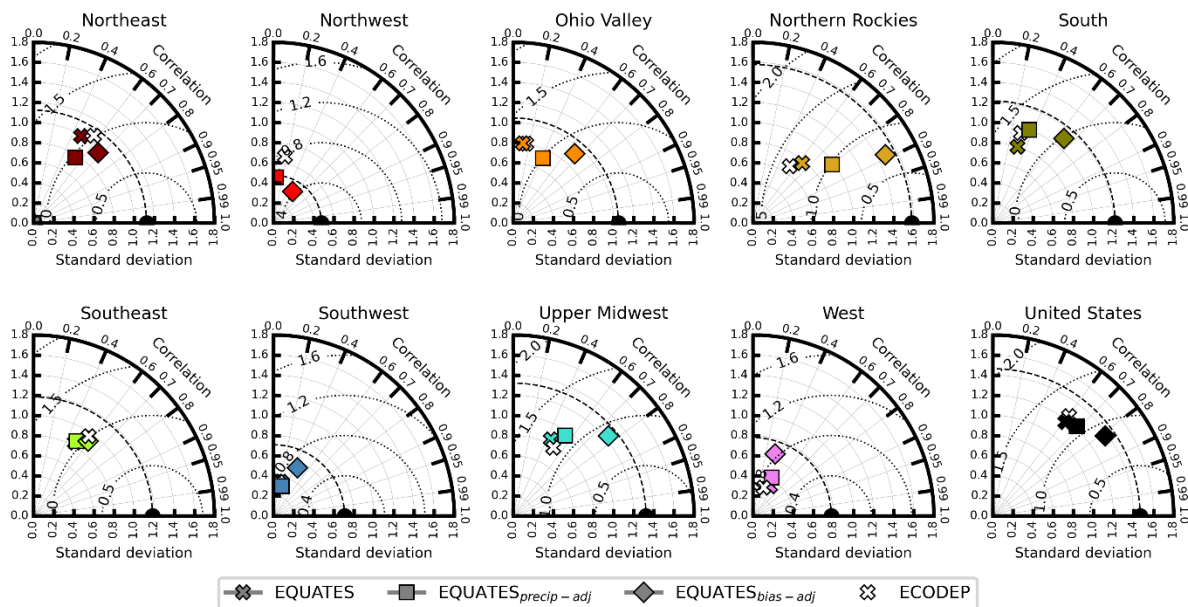

**Figure S3.** Taylor plot comparing 2002-2017 annual accumulated measured  $\text{NH}_4$  wet deposition ( $\text{kg/ha}$ ) with EQUATES and ECODEP (2002-2012) model output across climate regions within the CONUS. The symbols show how the unadjusted (x's), precipitation-adjusted (squares) and bias-adjusted (diamonds) modeled wet deposition compare to the NTN measurements (black circles).

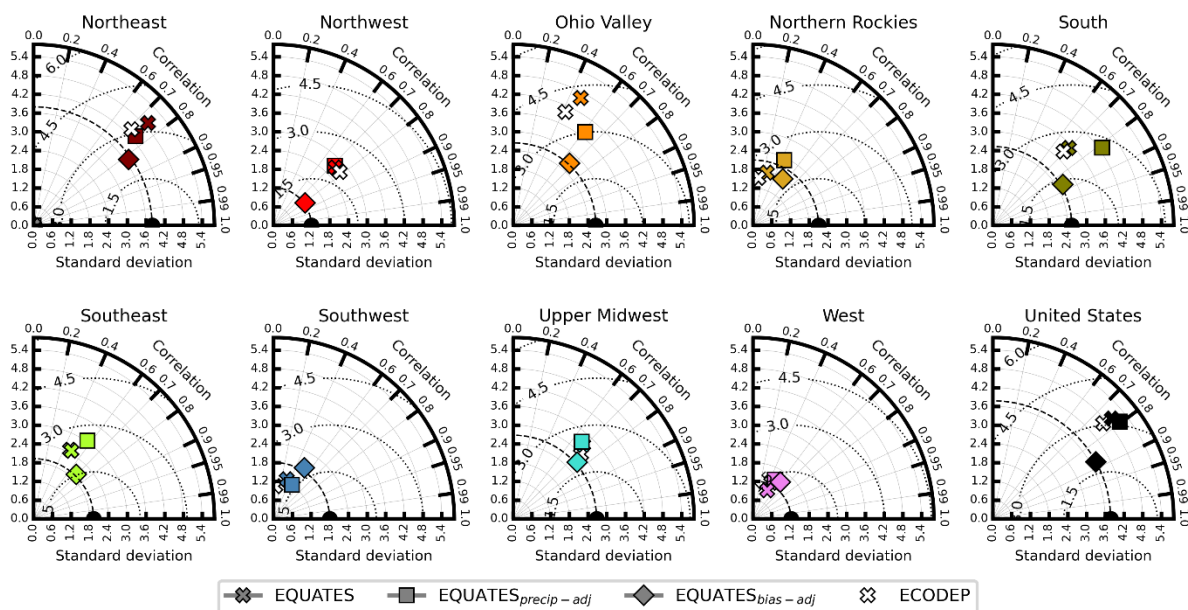

**Figure S4.** Taylor plot comparing 2002-2017 annual accumulated measured  $\text{NO}_3$  wet deposition ( $\text{kg/ha}$ ) with EQUATES and ECODEP (2002-2012) model output across climate regions within the CONUS. The symbols show how the unadjusted (x's), precipitation-adjusted (squares) and bias-adjusted (diamonds) modeled wet deposition compare to the NTN measurements (black circles).

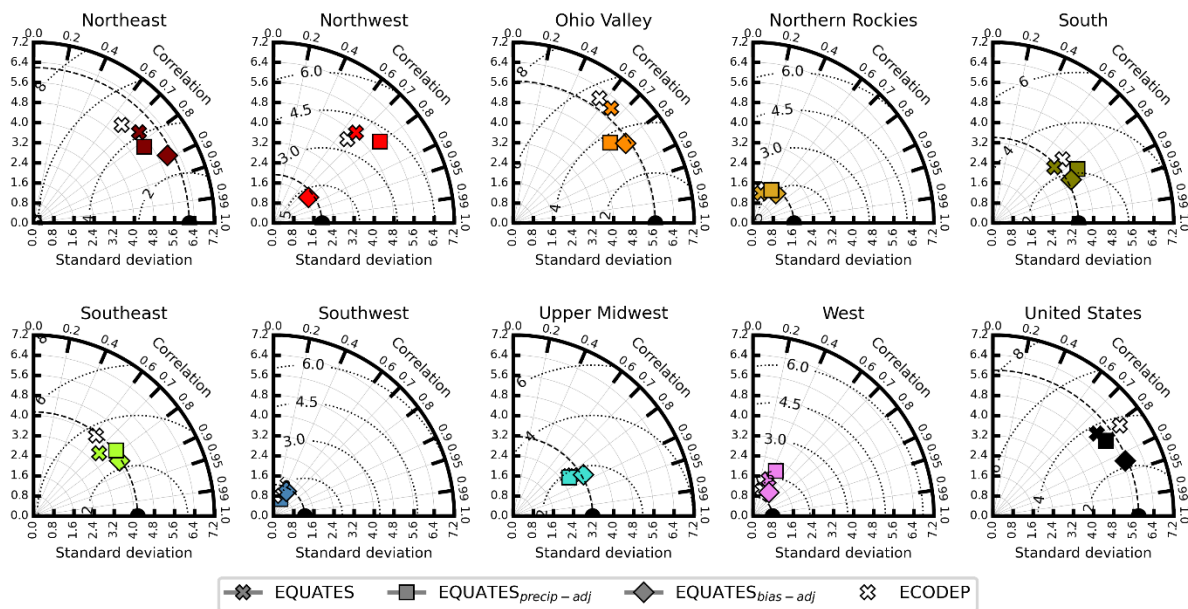

**Figure S5.** Taylor plot comparing 2002-2017 annual accumulated measured  $\text{SO}_4$  wet deposition (kg/ha) with EQUATES and ECODEP (2002-2012) model output across climate regions within the CONUS. The symbols show how the unadjusted (x's), precipitation-adjusted (squares) and bias-adjusted (diamonds) modeled wet deposition compare to the NTN measurements (black circles).

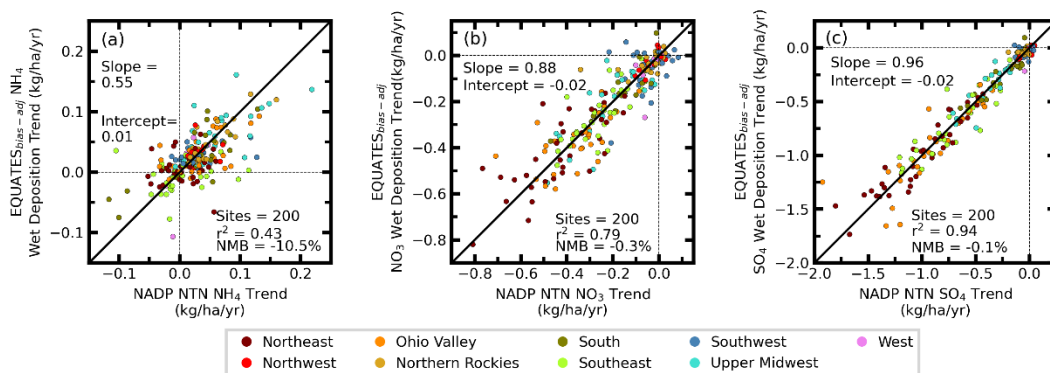

**Figure S6.** Scatter plot comparing the annual accumulated wet deposition trend (kg/ha/yr) from 2002 to 2017 between NTN observations and EQUATES model output for  $\text{NH}_4$  (a),  $\text{NO}_3$  (b), and  $\text{SO}_4$  (c). Each circle denotes a single NTN site, colored by the climate region that meet annual completeness criteria described in the text.

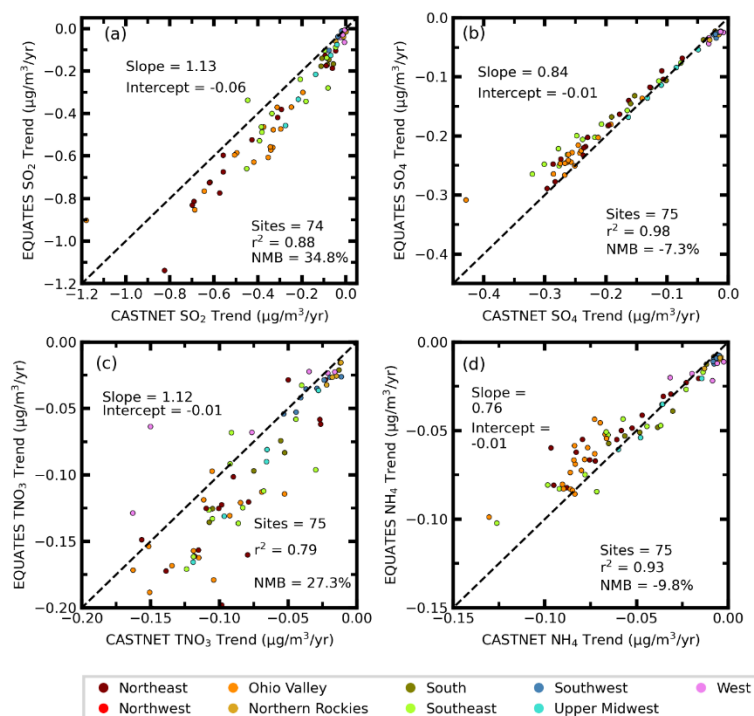

**Figure S7.** Scatter plot comparing the annual average concentration trend ( $\mu\text{g}/\text{m}^3/\text{yr}$ ) from 2002 to 2017 between CASTNET observations and EQUATES model output of sulfur dioxide (a,  $\text{SO}_2$ ), sulfate (b,  $\text{SO}_4$ ), total oxidized nitrogen (c,  $\text{TNO}_3$ ), and ammonium (d,  $\text{NH}_4$ ). Each circle denotes a single CASTNET site colored by the climate that meet annual completeness criteria.

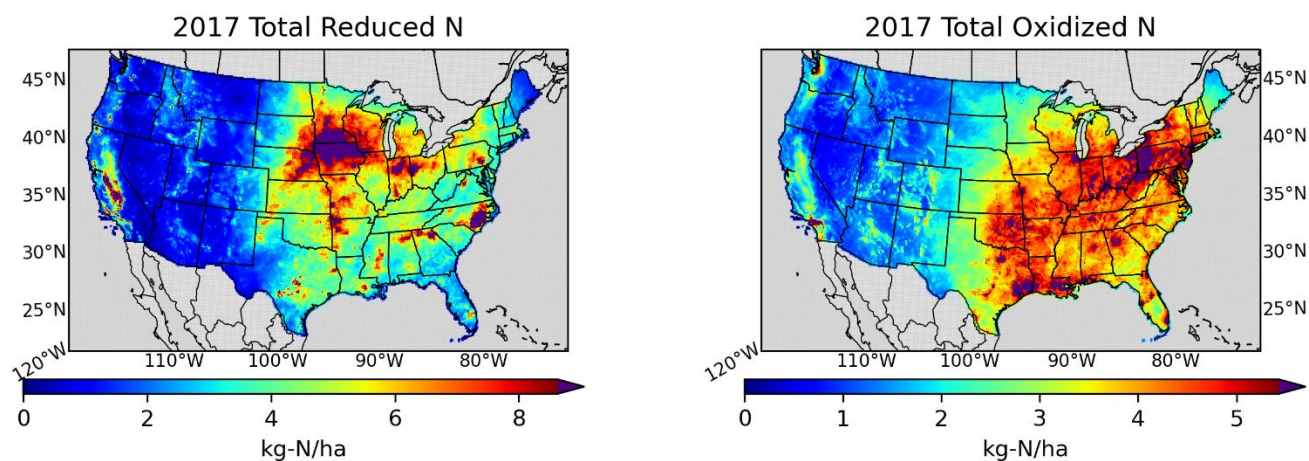

**Figure S8.** Spatial distribution of 2017 total reduced N deposition (left) and total oxidized N deposition (right). Units are  $\text{kg-N}/\text{ha}$ .



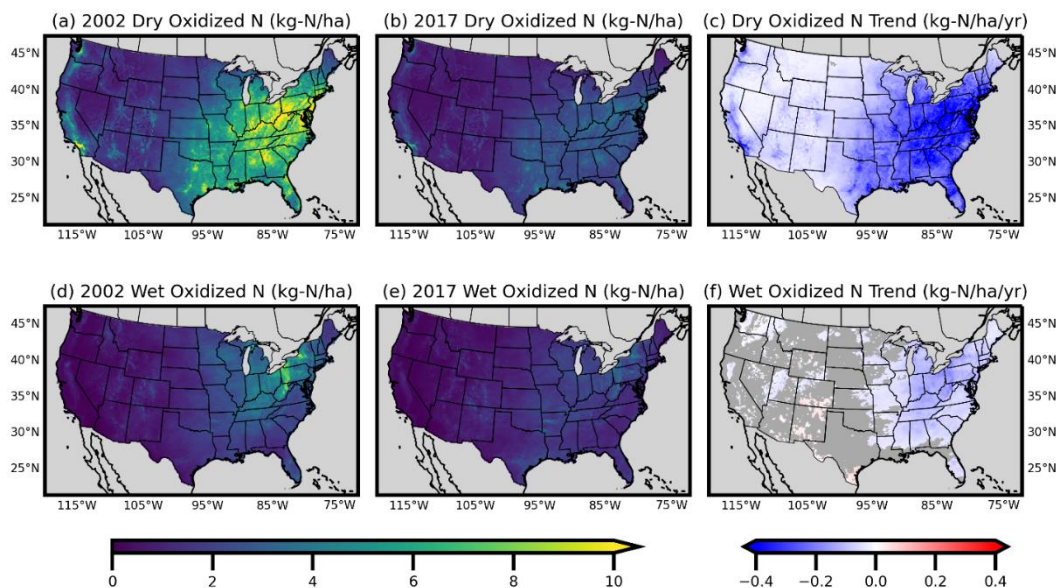

**Figure S9.** Spatial distribution of dry (top) and wet (bottom) oxidized N deposition in 2002 (a and d, kg-N/ha), 2017 (b and e, kg-N/ha), and the 2002-2017 annual trend (c and f, kg-N/ha/yr) with significance at the 95% confidence interval. Grey areas in panels (c) and (f) indicate where the trend is unavailable or not significant (i.e., p-value of the Wald's test is greater than 0.05).

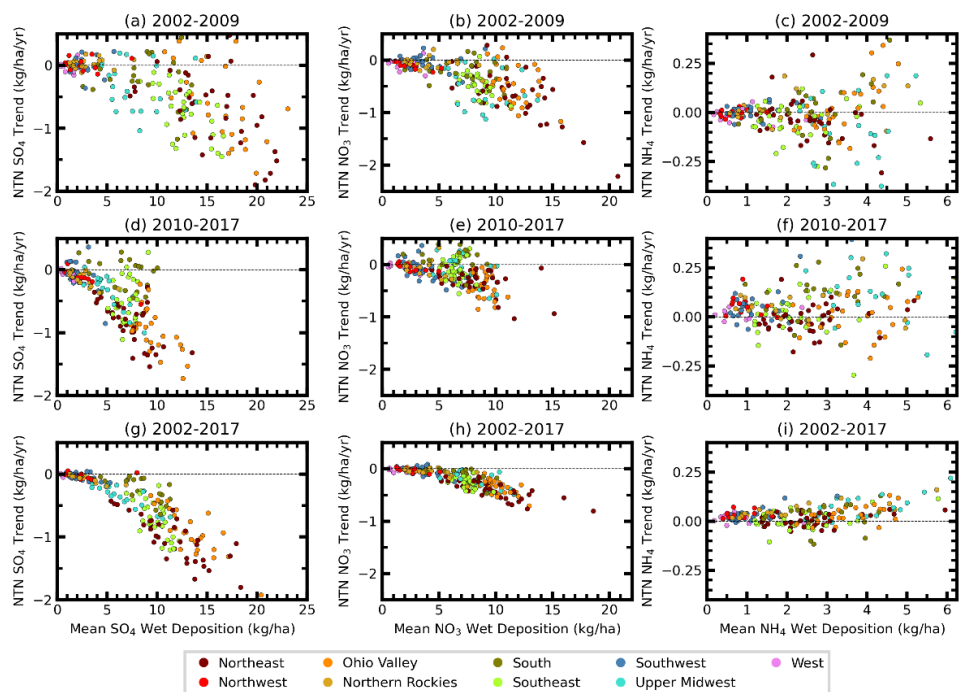

**Figure S10.** Measured wet deposition trends (kg/ha/yr) of  $\text{SO}_4$  (left),  $\text{NO}_3$  (middle), and  $\text{NH}_4$  (right) as a function of average measured deposition amount from 2002-2009 (top), 2010-2017 (middle), and 2002-2017 (bottom). Each circle is a NTN site colored by the climate region.

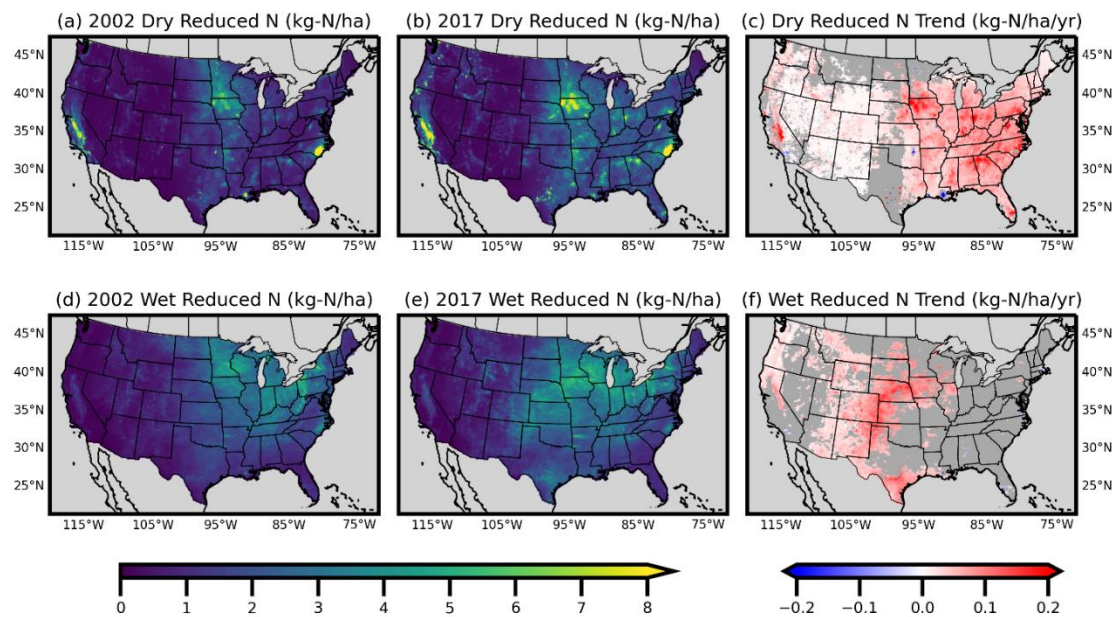

**Figure S11.** Spatial distribution of dry (top) and wet (bottom) reduced N deposition in 2002 (a and d, kg-N/ha), 2017 (b and e, kg-N/ha), and the 2002-2017 annual trend (c and f, kg-N/ha/yr) with significance at the 95% confidence interval. Grey areas in panels (c) and (f) indicate where the trend is unavailable or not significant (i.e., p-value of the Wald's test is greater than 0.05).



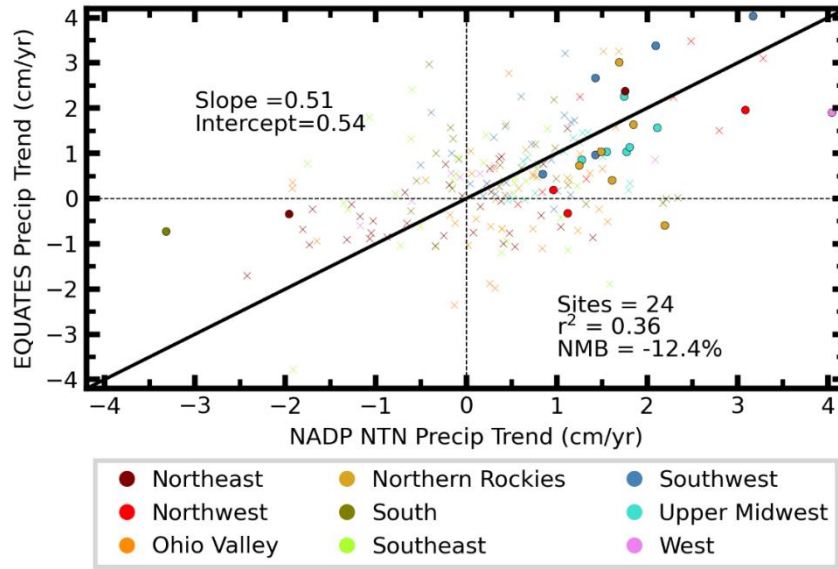

Figure S12. Scatter plot comparing the annual accumulated precipitation trend (cm/yr) from 2002 to 2017 between NTN observations and EQUATES model output. Each marker denotes a single NTN site colored by the climate region that meet annual completeness criteria. Circle markers indicate the observed trend is statistically significant with 95% confidence, while the x's denote insignificant trends. Summary statistics printed on the figure are computed for sites with statistically significant trends.

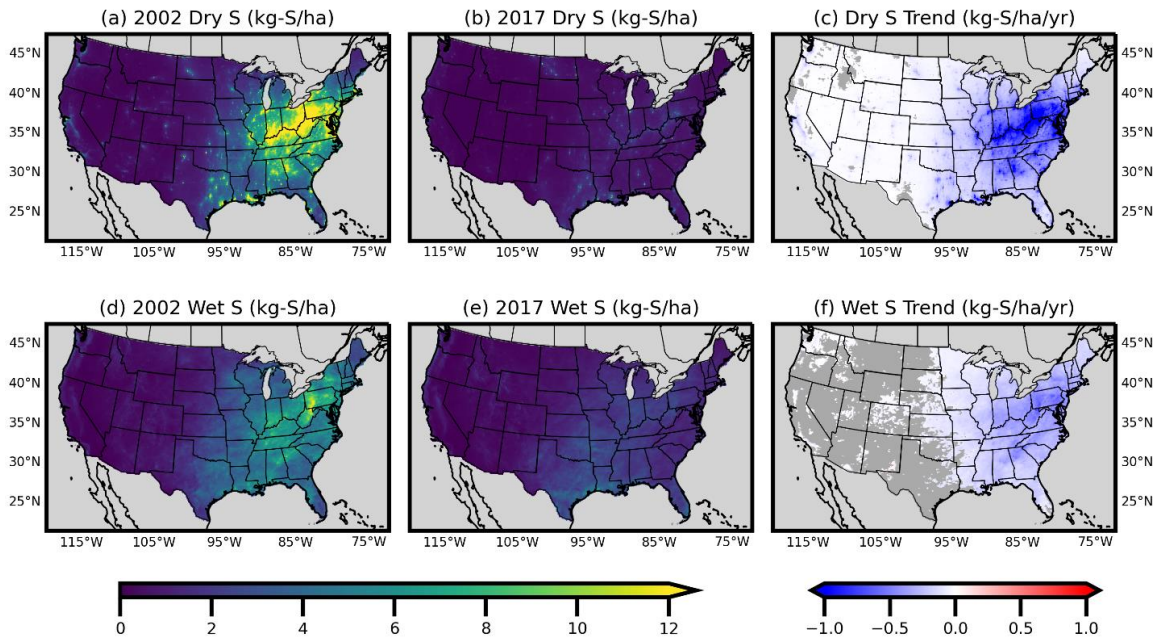

Figure S13. Spatial distribution of dry (top) and wet (bottom) S deposition in 2002 (a and d, kg-S/ha), 2017 (b and e, kg-S/ha), and the 2002-2017 annual trend (c and f, kg-S/ha/yr) with significance at the 95% confidence interval. Grey areas in panels (c) and (f) indicate where the trend is unavailable or not significant (i.e., p-value of the Wald's test is greater than 0.05).

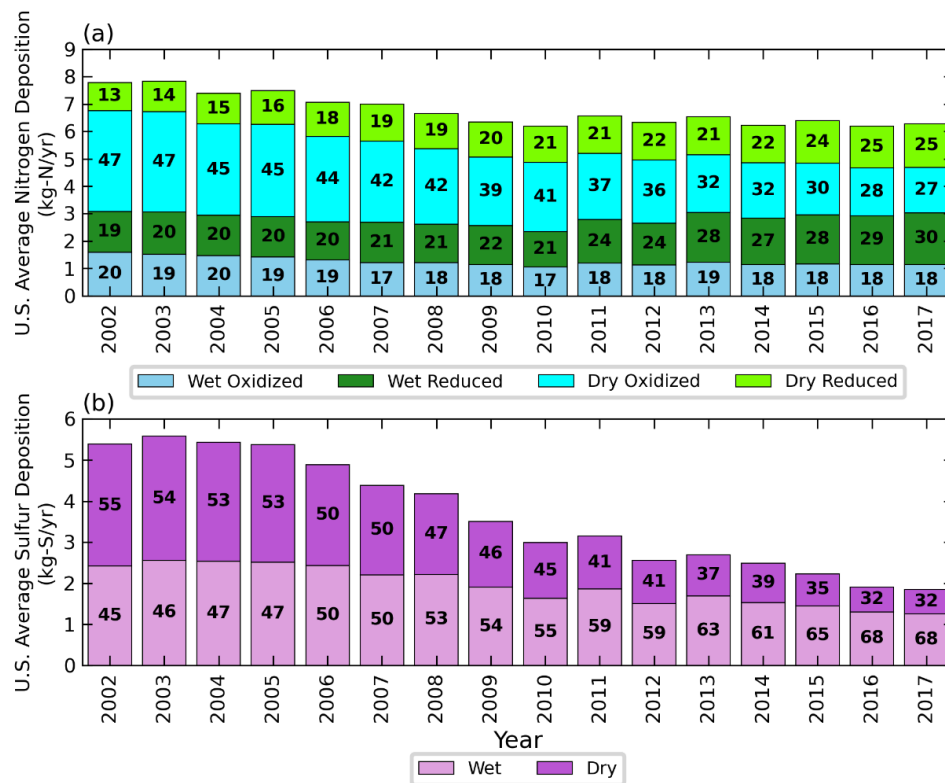

**Figure S14. Annual average total (wet+dry) nitrogen (panel a, kg-N/ha) and sulfur (panel b, kg-S/ha) deposition from 2002 to 2017 across the CONUS. The bold numbers in each bar denote the percentage contribution to the annual total.**

**Table S1. List of NTN site locations assessed in this study with years of valid data, climate region designations, and site class (I=isolated, R=rural, S=suburban, U=urban).**

| Site ID | Site Name                                     | Latitude | Longitude | Valid Years | NOAA Region | Site Class |
|---------|-----------------------------------------------|----------|-----------|-------------|-------------|------------|
| AL10    | Black Belt Research and Extension Center      | 32.4583  | -87.2422  | 15          | Southeast   | I          |
| AL99    | Sand Mountain Research and Extension Center   | 34.2886  | -85.9699  | 16          | Southeast   | R          |
| AR02    | Warren 2WSW                                   | 33.605   | -92.0972  | 16          | South       | R          |
| AR03    | Caddo Valley                                  | 34.1795  | -93.0992  | 15          | South       | R          |
| AR16    | Buffalo National River-Buffalo Point          | 36.0842  | -92.5868  | 15          | South       | I          |
| AR27    | Fayetteville                                  | 36.1011  | -94.1737  | 16          | South       | S          |
| AZ03    | Grand Canyon National Park-Hopi Point         | 36.0586  | -112.184  | 16          | Southwest   | I          |
| AZ06    | Organ Pipe Cactus National Monument           | 31.9492  | -112.802  | 16          | Southwest   | I          |
| AZ97    | Petrified Forest National Park-Rainbow Forest | 34.8224  | -109.893  | 14          | Southwest   | I          |
| AZ98    | Chiricahua                                    | 32.0097  | -109.389  | 16          | Southwest   | I          |
| AZ99    | Oliver Knoll                                  | 33.0708  | -109.866  | 14          | Southwest   | I          |
| CA42    | Tanbark Flat                                  | 34.2071  | -117.762  | 15          | West        | S          |
| CA45    | Hopland                                       | 39.0045  | -123.086  | 15          | West        | I          |
| CA66    | Pinnacles National Park-Bear Valley           | 36.4834  | -121.157  | 16          | West        | I          |
| CA67    | Joshua Tree National Park-Black Rock          | 34.0695  | -116.389  | 15          | West        | R          |
| CA76    | Montague                                      | 41.7662  | -122.48   | 16          | West        | R          |
| CA88    | Davis                                         | 38.5357  | -121.776  | 15          | West        | S          |
| CA96    | Lassen Volcanic National Park-Manzanita Lake  | 40.539   | -121.577  | 13          | West        | I          |
| CA99    | Yosemite National Park-Hodgdon Meadow         | 37.7961  | -119.858  | 14          | West        | I          |
| CO00    | Alamosa                                       | 37.4421  | -105.868  | 16          | Southwest   | R          |
| CO01    | Las Animas Fish Hatchery                      | 38.1177  | -103.316  | 16          | Southwest   | I          |
| CO08    | Four Mile Park                                | 39.4025  | -107.345  | 16          | Southwest   | R          |
| CO10    | Gothic                                        | 38.9561  | -106.986  | 16          | Southwest   | I          |
| CO19    | Rocky Meadows National Park-Beaver Meadows    | 40.3639  | -105.581  | 16          | Southwest   | R          |
| CO21    | Manitou                                       | 39.1008  | -105.093  | 16          | Southwest   | R          |
| CO22    | Pawnee                                        | 40.806   | -104.756  | 14          | Southwest   | I          |
| CO91    | Wolf Creek Pass                               | 37.4686  | -106.787  | 15          | Southwest   | I          |
| CO92    | Sunlight Peak                                 | 39.4264  | -107.38   | 15          | Southwest   | R          |
| CO93    | Buffalo Pass-Dry Lake                         | 40.5347  | -106.781  | 16          | Southwest   | R          |
| CO94    | Sugarloaf                                     | 39.9939  | -105.48   | 16          | Southwest   | R          |
| CO96    | Molas Pass                                    | 37.75    | -107.689  | 15          | Southwest   | I          |

|      |                                            |         |          |    |               |   |
|------|--------------------------------------------|---------|----------|----|---------------|---|
| CO97 | Buffalo Pass-Summit Lake                   | 40.5383 | -106.677 | 16 | Southwest     | R |
| CO98 | Rocky Mountain National Park-Loch Vale     | 40.2878 | -105.663 | 13 | Southwest     | I |
| CO99 | Mesa Verde National Park-Chapin Mesa       | 37.1979 | -108.491 | 16 | Southwest     | I |
| CT15 | Abington                                   | 41.84   | -72.0101 | 16 | Northeast     | R |
| FL03 | Bradford Forest                            | 29.9748 | -82.1978 | 14 | Southeast     | R |
| FL05 | Chassahowitzka National Wildlife Refuge    | 28.7486 | -82.5551 | 16 | Southeast     | R |
| FL11 | Everglades National Park-Research Center   | 25.39   | -80.68   | 16 | Southeast     | I |
| FL14 | Quincy                                     | 30.5486 | -84.6004 | 16 | Southeast     | R |
| FL23 | Sumatra                                    | 30.1106 | -84.9902 | 16 | Southeast     | I |
| FL41 | Verna Well Field                           | 27.3801 | -82.2831 | 16 | Southeast     | R |
| FL99 | Kennedy Space Center                       | 28.5428 | -80.644  | 13 | Southeast     | R |
| GA09 | Okefenokee National Wildlife Refuge        | 30.7404 | -82.1283 | 16 | Southeast     | I |
| GA20 | Bellville                                  | 32.0849 | -81.9367 | 15 | Southeast     | R |
| GA33 | Sapelo Island                              | 31.3961 | -81.2811 | 13 | Southeast     | I |
| GA41 | Georgia Station                            | 33.1805 | -84.4103 | 15 | Southeast     | R |
| GA99 | Chula                                      | 31.5217 | -83.5482 | 16 | Southeast     | R |
| IA08 | Big Springs Fish Hatchery                  | 42.9097 | -91.47   | 15 | Upper Midwest | I |
| IA23 | McNay Research Center                      | 40.9631 | -93.3925 | 16 | Upper Midwest | R |
| ID02 | Priest River Experimental Forest           | 48.3518 | -116.84  | 15 | Northwest     | I |
| ID03 | Craters of the Moon National Monument      | 43.4605 | -113.555 | 16 | Northwest     | I |
| ID11 | Reynolds Creek                             | 43.2049 | -116.75  | 16 | Northwest     | I |
| IL11 | Bondville                                  | 40.0528 | -88.3719 | 16 | Ohio Valley   | S |
| IL18 | Shabbona                                   | 41.8414 | -88.8511 | 14 | Ohio Valley   | R |
| IL46 | Alhambra                                   | 38.8689 | -89.6219 | 16 | Ohio Valley   | R |
| IL63 | Dixon Springs Agricultural Center          | 37.4356 | -88.6719 | 15 | Ohio Valley   | I |
| IL78 | Monmouth                                   | 40.9333 | -90.7231 | 16 | Ohio Valley   | R |
| IN20 | Roush Lake                                 | 40.8401 | -85.4639 | 16 | Ohio Valley   | R |
| IN22 | Southwest Purdue Agriculture Center        | 38.7408 | -87.4855 | 15 | Ohio Valley   | R |
| IN34 | Indiana Dunes National Lakeshore           | 41.6318 | -87.0881 | 16 | Ohio Valley   | S |
| IN41 | Agronomy Center for Research and Extension | 40.4749 | -86.9924 | 16 | Ohio Valley   | S |
| KS07 | Farlington Fish Hatchery                   | 37.6511 | -94.8036 | 16 | South         | I |
| KS31 | Konza Prairie                              | 39.1022 | -96.6092 | 16 | South         | R |
| KS32 | Lake Scott State Park                      | 38.6717 | -100.916 | 16 | South         | I |
| KY03 | Mackville                                  | 37.7047 | -85.0489 | 16 | Ohio Valley   | R |
| KY10 | Mammoth Cave National Park-Houchin Meadow  | 37.1317 | -86.148  | 15 | Ohio Valley   | R |

|      |                                              |         |          |    |               |   |
|------|----------------------------------------------|---------|----------|----|---------------|---|
| KY19 | Cannons Lane                                 | 38.2288 | -85.6545 | 13 | Ohio Valley   | U |
| KY22 | Lilley Cornett Woods                         | 37.0778 | -82.9936 | 16 | Ohio Valley   | R |
| KY35 | Clark State Fish Hatchery                    | 38.1183 | -83.5469 | 14 | Ohio Valley   | R |
| KY99 | Mulberry Flatt                               | 36.9029 | -88.0121 | 16 | Ohio Valley   | I |
| LA30 | Southeast Research Station                   | 30.7819 | -90.2021 | 16 | South         | R |
| MA01 | North Atlantic Coastal Lab                   | 41.9759 | -70.0241 | 15 | Northeast     | R |
| MA08 | Quabbin Reservoir                            | 42.3925 | -72.3444 | 16 | Northeast     | R |
| MD13 | Wye                                          | 38.9131 | -76.1525 | 16 | Northeast     | R |
| MD15 | Smith Island                                 | 37.9925 | -76.0345 | 13 | Northeast     | I |
| MD18 | Assateague Island National Seashore-Woodcock | 38.251  | -75.1593 | 16 | Northeast     | R |
| MD99 | Beltsville                                   | 39.028  | -76.8171 | 13 | Northeast     | U |
| ME00 | Caribou                                      | 46.8675 | -68.0134 | 15 | Northeast     | R |
| ME02 | Bridgton                                     | 44.1075 | -70.7289 | 16 | Northeast     | R |
| ME04 | Carrabassett Valley                          | 45.0803 | -70.2118 | 13 | Northeast     | I |
| ME09 | Greenville Station                           | 45.4891 | -69.6647 | 15 | Northeast     | I |
| ME96 | Casco Bay-Wolfe's Neck Farm                  | 43.8325 | -70.0645 | 16 | Northeast     | R |
| ME98 | Acadia National Park-McFarland Hill          | 44.3772 | -68.2608 | 16 | Northeast     | R |
| MI09 | Douglas Lake                                 | 45.5608 | -84.6783 | 16 | Upper Midwest | R |
| MI26 | Kellogg Biological Station                   | 42.4103 | -85.3928 | 16 | Upper Midwest | R |
| MI48 | Seney National Wildlife Refuge-Headquarters  | 46.2889 | -85.9504 | 16 | Upper Midwest | I |
| MI51 | Unionville                                   | 43.6135 | -83.3599 | 16 | Upper Midwest | R |
| MI52 | Ann Arbor                                    | 42.4164 | -83.9019 | 16 | Upper Midwest | S |
| MI53 | Wellston                                     | 44.2242 | -85.8186 | 16 | Upper Midwest | I |
| MI99 | Chassell                                     | 47.1046 | -88.5516 | 16 | Upper Midwest | R |
| MN01 | Cedar Creek                                  | 45.4017 | -93.2031 | 16 | Upper Midwest | R |
| MN08 | Hovland                                      | 47.8471 | -89.965  | 16 | Upper Midwest | I |
| MN16 | Marcell Experimental Forest                  | 47.5311 | -93.4686 | 16 | Upper Midwest | I |
| MN18 | Fernberg                                     | 47.9464 | -91.4961 | 15 | Upper Midwest | I |
| MN23 | Camp Ripley                                  | 46.2494 | -94.4972 | 15 | Upper Midwest | I |
| MN27 | Lamberton                                    | 44.237  | -95.3011 | 15 | Upper Midwest | I |
| MN28 | Grindstone Lake                              | 46.1217 | -93.0001 | 16 | Upper Midwest | R |
| MN32 | Voyageurs National Park-Sullivan Bay         | 48.4132 | -92.8305 | 15 | Upper Midwest | I |
| MN99 | Wolf Ridge                                   | 47.3841 | -91.2067 | 16 | Upper Midwest | I |
| MO03 | Ashland Wildlife Area                        | 38.754  | -92.1994 | 15 | Ohio Valley   | R |
| MO05 | University Forest                            | 36.9108 | -90.3187 | 16 | Ohio Valley   | R |



|      |                                                 |         |          |    |                  |   |
|------|-------------------------------------------------|---------|----------|----|------------------|---|
| MS10 | Clinton                                         | 32.3069 | -90.3186 | 14 | South            | S |
| MS19 | Newton                                          | 32.3269 | -89.2086 | 15 | South            | R |
| MS30 | Coffeeville                                     | 34.0025 | -89.7993 | 13 | South            | I |
| MT00 | Little Bighorn Battlefield National Monument    | 45.5701 | -107.438 | 14 | Northern Rockies | I |
| MT05 | Glacier National Park-Fire Weather Station      | 48.5102 | -113.997 | 16 | Northern Rockies | I |
| MT07 | Clancy                                          | 46.485  | -112.065 | 14 | Northern Rockies | R |
| MT98 | Havre-Northern Agricultural Research Center     | 48.5007 | -109.798 | 15 | Northern Rockies | R |
| NC03 | Lewiston                                        | 36.1325 | -77.1708 | 16 | Southeast        | I |
| NC06 | Beaufort                                        | 34.8846 | -76.6207 | 15 | Southeast        | R |
| NC25 | Coweeta                                         | 35.0605 | -83.4305 | 16 | Southeast        | R |
| NC29 | Hofmann Forest                                  | 34.825  | -77.3228 | 15 | Southeast        | S |
| NC34 | Piedmont Research Station                       | 35.697  | -80.6225 | 16 | Southeast        | R |
| NC35 | Clinton Crops Research Station                  | 35.0258 | -78.2783 | 16 | Southeast        | R |
| NC36 | Jordan Creek                                    | 34.9705 | -79.5281 | 15 | Southeast        | R |
| NC41 | Finley Farm                                     | 35.7288 | -78.6802 | 16 | Southeast        | U |
| ND00 | Theodore Roosevelt National Park-Painted Canyon | 46.8951 | -103.378 | 16 | Northern Rockies | I |
| ND08 | Icelandic State Park                            | 48.782  | -97.7546 | 13 | Northern Rockies | I |
| ND11 | Woodworth                                       | 47.1247 | -99.2381 | 15 | Northern Rockies | I |
| NE15 | Mead                                            | 41.1528 | -96.4912 | 16 | Northern Rockies | R |
| NE99 | North Platte Agricultural Experiment Station    | 41.0592 | -100.746 | 14 | Northern Rockies | R |
| NH02 | Hubbard Brook                                   | 43.9433 | -71.7029 | 16 | Northeast        | R |
| NJ00 | Edwin B. Forsythe National Wildlife Refuge      | 39.4728 | -74.4369 | 15 | Northeast        | S |
| NJ99 | Washington Crossing                             | 40.3154 | -74.8536 | 16 | Northeast        | U |
| NM07 | Bandelier National Monument                     | 35.7788 | -106.266 | 16 | Southwest        | R |
| NM08 | Mayhill                                         | 32.9096 | -105.471 | 14 | Southwest        | I |
| NV03 | Smith Valley                                    | 38.7992 | -119.257 | 16 | West             | I |
| NV05 | Great Basin National Park-Lehman Caves          | 39.0054 | -114.217 | 15 | West             | I |
| NY01 | Alfred                                          | 42.2276 | -77.8016 | 13 | Northeast        | R |
| NY08 | Aurora Research Farm                            | 42.7339 | -76.6597 | 16 | Northeast        | R |
| NY10 | Chautauqua                                      | 42.2994 | -79.3964 | 15 | Northeast        | R |
| NY20 | Huntington Wildlife                             | 43.9731 | -74.2231 | 16 | Northeast        | I |
| NY22 | Akwesasne Mohawk-Fort Covington                 | 44.9226 | -74.4806 | 15 | Northeast        | R |
| NY52 | Bennett Bridge                                  | 43.5282 | -75.9492 | 13 | Northeast        | R |
| NY68 | Biscuit Brook                                   | 41.9936 | -74.5031 | 16 | Northeast        | I |
| NY96 | Cedar Beach-Southold                            | 41.0347 | -72.3891 | 13 | Northeast        | R |

|      |                                                          |         |          |    |                  |   |
|------|----------------------------------------------------------|---------|----------|----|------------------|---|
| NY98 | Whiteface Mountain                                       | 44.3933 | -73.8594 | 16 | Northeast        | I |
| NY99 | West Point                                               | 41.3511 | -74.0484 | 16 | Northeast        | S |
| OH09 | Oxford                                                   | 39.5309 | -84.7238 | 16 | Ohio Valley      | R |
| OH17 | Delaware                                                 | 40.3555 | -83.0661 | 16 | Ohio Valley      | R |
| OH49 | Caldwell                                                 | 39.7928 | -81.5311 | 16 | Ohio Valley      | R |
| OH54 | Deer Creek State Park                                    | 39.6359 | -83.2606 | 16 | Ohio Valley      | R |
| OH71 | Wooster                                                  | 40.7813 | -81.9197 | 16 | Ohio Valley      | R |
| OK00 | Salt Northern Rockies National Wildlife Refuge           | 36.7863 | -98.18   | 16 | South            | I |
| OK17 | Kessler Farm Field Laboratory                            | 34.98   | -97.5214 | 15 | South            | R |
| OK29 | Goodwell Research Station                                | 36.5908 | -101.618 | 16 | South            | I |
| OR10 | H. J. Andrews Experimental Forest                        | 44.2118 | -122.256 | 16 | Northwest        | I |
| OR18 | Starkey Experimental Forest                              | 45.2247 | -118.513 | 16 | Northwest        | I |
| OR97 | Hyslop Farm                                              | 44.6347 | -123.19  | 16 | Northwest        | S |
| PA00 | Arendtsville                                             | 39.9231 | -77.3078 | 16 | Northeast        | R |
| PA15 | Penn State                                               | 40.7883 | -77.9458 | 16 | Northeast        | S |
| PA18 | Young Woman's Creek                                      | 41.4142 | -77.6799 | 16 | Northeast        | I |
| PA29 | Kane Experimental Forest                                 | 41.5978 | -78.7675 | 16 | Northeast        | R |
| PA42 | Leading Ridge                                            | 40.6575 | -77.9397 | 16 | Northeast        | R |
| PA47 | Millersville                                             | 39.9909 | -76.3856 | 14 | Northeast        | S |
| PA72 | Milford                                                  | 41.3273 | -74.8199 | 13 | Northeast        | R |
| SC05 | Cape Romain National Wildlife Refuge                     | 32.943  | -79.6592 | 16 | Southeast        | R |
| SC06 | Santee National Wildlife Refuge                          | 33.5394 | -80.435  | 15 | Southeast        | R |
| SD04 | Wind Cave National Park-Elk Mountain                     | 43.5577 | -103.484 | 14 | Northern Rockies | I |
| SD08 | Cottonwood                                               | 43.9461 | -101.855 | 15 | Northern Rockies | I |
| SD99 | Huron Well Field                                         | 44.355  | -98.2917 | 16 | Northern Rockies | R |
| TN04 | Speedwell                                                | 36.4698 | -83.8272 | 16 | Ohio Valley      | R |
| TN11 | Great Smoky Mountains National Park-Elkmount             | 35.6645 | -83.5903 | 16 | Ohio Valley      | R |
| TN14 | Hatchie National Wildlife Refuge                         | 35.4688 | -89.1713 | 14 | Ohio Valley      | I |
| TX03 | Beeville                                                 | 28.4667 | -97.7069 | 16 | South            | R |
| TX04 | Big Bend National Park-K-Bar                             | 29.3025 | -103.178 | 15 | South            | I |
| TX10 | Attwater Prairie Chicken National Wildlife Refuge        | 29.6614 | -96.2594 | 14 | South            | R |
| TX16 | Sonora                                                   | 30.2613 | -100.555 | 16 | South            | I |
| TX21 | Longview                                                 | 32.3786 | -94.7117 | 16 | South            | R |
| TX22 | Guadalupe Mountains National Park Frijole Ranger Station | 31.9069 | -104.805 | 15 | South            | I |
| TX56 | L.B.J. National Grasslands                               | 33.3917 | -97.6397 | 16 | South            | I |

|      |                                                         |         |          |    |                  |   |
|------|---------------------------------------------------------|---------|----------|----|------------------|---|
| UT01 | Logan                                                   | 41.6661 | -111.891 | 15 | Southwest        | S |
| UT09 | Canyonlands National Park-Island in the Sky             | 38.4584 | -109.821 | 15 | Southwest        | I |
| UT98 | Green River                                             | 39.0001 | -110.174 | 16 | Southwest        | I |
| UT99 | Bryce Canyon National Park-Repeater Hill                | 37.6186 | -112.173 | 16 | Southwest        | I |
| VA00 | Charlottesville                                         | 38.0402 | -78.5427 | 16 | Southeast        | S |
| VA13 | Hortons Station                                         | 37.3232 | -80.4572 | 16 | Southeast        | R |
| VA24 | Prince Edward                                           | 37.1652 | -78.3073 | 16 | Southeast        | R |
| VA28 | Shenandoah National Park-Big Meadows                    | 38.5231 | -78.4348 | 15 | Southeast        | R |
| VA99 | Natural Bridge Station                                  | 37.6265 | -79.5126 | 15 | Southeast        | R |
| VT01 | Bennington                                              | 42.8761 | -73.1633 | 16 | Northeast        | R |
| VT99 | Underhill                                               | 44.5283 | -72.8684 | 16 | Northeast        | R |
| WA14 | Olympic National Park-Hoh Ranger Station                | 47.8597 | -123.933 | 14 | Northwest        | I |
| WA19 | North Cascades National Park-Marblemount Ranger Station | 48.5403 | -121.446 | 16 | Northwest        | I |
| WA21 | La Grande                                               | 46.8353 | -122.287 | 14 | Northwest        | R |
| WA24 | Palouse Conservation Farm                               | 46.7606 | -117.185 | 16 | Northwest        | R |
| WA98 | Columbia River Gorge                                    | 45.5694 | -122.21  | 14 | Northwest        | R |
| WA99 | Mount Rainier National Park-Tahoma Woods                | 46.7582 | -122.124 | 15 | Northwest        | I |
| WI35 | Perkinstown                                             | 45.2064 | -90.5978 | 16 | Upper Midwest    | I |
| WI36 | Trout Lake                                              | 46.0512 | -89.6541 | 16 | Upper Midwest    | I |
| WI37 | Spooner                                                 | 45.8228 | -91.8744 | 15 | Upper Midwest    | R |
| WV05 | Cedar Creek State Park                                  | 38.8794 | -80.8476 | 15 | Ohio Valley      | R |
| WV18 | Parsons                                                 | 39.0897 | -79.6622 | 16 | Ohio Valley      | I |
| WY00 | Snowy Range                                             | 41.3762 | -106.26  | 16 | Northern Rockies | I |
| WY02 | Sinks Canyon                                            | 42.7336 | -108.85  | 16 | Northern Rockies | I |
| WY06 | Pinedale                                                | 42.929  | -109.788 | 13 | Northern Rockies | I |
| WY08 | Yellowstone National Park-Tower Falls                   | 44.9166 | -110.42  | 16 | Northern Rockies | I |
| WY95 | Brooklyn Lake                                           | 41.3647 | -106.241 | 16 | Northern Rockies | I |
| WY98 | Gypsum Creek                                            | 43.2227 | -109.992 | 13 | Northern Rockies | I |
| WY99 | Newcastle                                               | 43.873  | -104.192 | 16 | Northern Rockies | I |

**Table S2. Location of CASTNET sites assessed in this study with years of valid data and climate region designations.**

| Site ID | Latitude | Longitude | NOAA Region      | Valid Years |
|---------|----------|-----------|------------------|-------------|
| ABT147  | 41.8405  | -72.0104  | Northeast        | 16          |
| ACA416  | 44.3771  | -68.2608  | Northeast        | 16          |
| ALC188  | 30.7016  | -94.674   | South            | 14          |
| ALH157  | 38.869   | -89.6228  | Ohio Valley      | 16          |
| ANA115  | 42.4166  | -83.9022  | Upper Midwest    | 16          |
| ARE128  | 39.9232  | -77.3079  | Northeast        | 16          |
| ASH135  | 46.6038  | -68.4132  | Northeast        | 16          |
| BBE401  | 29.3027  | -103.178  | South            | 16          |
| BEL116  | 39.0282  | -76.8171  | Northeast        | 15          |
| BFT142  | 34.8847  | -76.6207  | Southeast        | 16          |
| BVL130  | 40.052   | -88.3725  | Ohio Valley      | 16          |
| BWR139  | 38.445   | -76.1113  | Northeast        | 16          |
| CAD150  | 34.1793  | -93.0988  | South            | 16          |
| CAN407  | 38.4583  | -109.821  | Southwest        | 16          |
| CAT175  | 41.9423  | -74.552   | Northeast        | 16          |
| CDR119  | 38.8795  | -80.8477  | Ohio Valley      | 16          |
| CDZ171  | 36.7841  | -87.8502  | Ohio Valley      | 16          |
| CHA467  | 32.0094  | -109.389  | Southwest        | 16          |
| CHE185  | 35.7508  | -94.6698  | South            | 16          |
| CKT136  | 37.9215  | -83.0663  | Ohio Valley      | 16          |
| CND125  | 35.2633  | -79.8375  | Southeast        | 16          |
| CNT169  | 41.3645  | -106.24   | Northern Rockies | 16          |
| COW137  | 35.0605  | -83.4303  | Southeast        | 16          |
| CTH110  | 42.4009  | -76.6535  | Northeast        | 16          |
| CVL151  | 34.0027  | -89.7992  | South            | 16          |
| DCP114  | 39.6359  | -83.2606  | Ohio Valley      | 16          |
| ESP127  | 36.0389  | -85.733   | Ohio Valley      | 16          |
| EVE419  | 25.3912  | -80.6808  | Southeast        | 15          |
| GAS153  | 33.1812  | -84.4101  | Southeast        | 16          |
| GLR468  | 48.5103  | -113.997  | Northern Rockies | 16          |
| GRB411  | 39.0051  | -114.216  | West             | 15          |
| GRC474  | 36.0586  | -112.184  | Southwest        | 16          |
| GRS420  | 35.6335  | -83.9416  | Ohio Valley      | 15          |
| GTH161  | 38.9563  | -106.986  | Southwest        | 16          |
| HOX148  | 44.1809  | -85.739   | Upper Midwest    | 15          |
| HWF187  | 43.973   | -74.2233  | Northeast        | 16          |
| IRL141  | 27.8492  | -80.4556  | Southeast        | 15          |
| JOT403  | 34.0696  | -116.389  | West             | 16          |
| KEF112  | 41.5981  | -78.7679  | Northeast        | 15          |
| KNZ184  | 39.1022  | -96.6096  | South            | 16          |

|        |         |          |                  |    |
|--------|---------|----------|------------------|----|
| LAV410 | 40.54   | -121.577 | West             | 16 |
| LRL117 | 39.9883 | -79.2516 | Northeast        | 16 |
| MAC426 | 37.1318 | -86.143  | Ohio Valley      | 16 |
| MCK131 | 37.7047 | -85.0487 | Ohio Valley      | 15 |
| MCK231 | 37.7047 | -85.0487 | Ohio Valley      | 16 |
| MEV405 | 37.1984 | -108.491 | Southwest        | 14 |
| MKG113 | 41.4268 | -80.1452 | Northeast        | 16 |
| OXF122 | 39.5311 | -84.7235 | Ohio Valley      | 16 |
| PAR107 | 39.0904 | -79.6617 | Ohio Valley      | 16 |
| PED108 | 37.1652 | -78.3071 | Southeast        | 13 |
| PET427 | 34.8225 | -109.893 | Southwest        | 16 |
| PIN414 | 36.4832 | -121.157 | West             | 16 |
| PND165 | 42.929  | -109.788 | Northern Rockies | 16 |
| PNF126 | 36.1054 | -82.045  | Southeast        | 16 |
| PRK134 | 45.2065 | -90.5972 | Upper Midwest    | 15 |
| PSU106 | 40.7209 | -77.9318 | Northeast        | 16 |
| QAK172 | 39.9427 | -81.3379 | Ohio Valley      | 16 |
| ROM206 | 40.2781 | -105.546 | Southwest        | 16 |
| ROM406 | 40.2781 | -105.546 | Southwest        | 16 |
| SAL133 | 40.816  | -85.6614 | Ohio Valley      | 15 |
| SEK430 | 36.4895 | -118.829 | West             | 13 |
| SHN418 | 38.5231 | -78.4347 | Southeast        | 15 |
| SND152 | 34.289  | -85.9701 | Southeast        | 15 |
| SPD111 | 36.4698 | -83.8265 | Ohio Valley      | 15 |
| STK138 | 42.2872 | -89.9999 | Ohio Valley      | 16 |
| SUM156 | 30.1102 | -84.9904 | Southeast        | 16 |
| THR422 | 46.8948 | -103.378 | Northern Rockies | 15 |
| UVL124 | 43.6136 | -83.3599 | Upper Midwest    | 16 |
| VIN140 | 38.7408 | -87.4849 | Ohio Valley      | 16 |
| VOY413 | 48.4125 | -92.8292 | Upper Midwest    | 16 |
| VPI120 | 37.3232 | -80.4572 | Southeast        | 16 |
| WSP144 | 40.3123 | -74.8727 | Northeast        | 16 |
| WST109 | 43.9445 | -71.7008 | Northeast        | 15 |
| YEL408 | 44.5654 | -110.4   | Northern Rockies | 16 |
| YOS404 | 37.7132 | -119.706 | West             | 16 |



**Table S3. Uncorrected EQUATES model performance metrics of seasonal and annual accumulated wet deposition of NO<sub>3</sub>, NH<sub>4</sub>, SO<sub>4</sub>, and precipitation.**

|                 |                | Winter | Spring | Summer | Fall  | Annual, no adjustment (Table 1) |
|-----------------|----------------|--------|--------|--------|-------|---------------------------------|
| NO <sub>3</sub> | r <sup>2</sup> | 0.63   | 0.74   | 0.60   | 0.69  | 0.77                            |
|                 | MB (kg/ha)     | 0.01   | 0.09   | 0.04   | 0.23  | 0.55                            |
|                 | NMB (%)        | 1.37   | 5.44   | 2.22   | 20.90 | 9.64                            |
| NH <sub>4</sub> | r <sup>2</sup> | 0.50   | 0.63   | 0.49   | 0.55  | 0.61                            |
|                 | MB (kg/ha)     | -0.10  | -0.23  | -0.03  | -0.10 | -0.49                           |
|                 | NMB (%)        | -39.7  | -34.8  | -3.70  | -25.0 | -19.9                           |
| SO <sub>4</sub> | r <sup>2</sup> | 0.65   | 0.71   | 0.72   | 0.67  | 0.78                            |
|                 | MB (kg/ha)     | -0.17  | -0.26  | -0.30  | -0.17 | -0.92                           |
|                 | NMB (%)        | -18.9  | -14.3  | -14.5  | -12.9 | -12.2                           |
| Precipitation   | r <sup>2</sup> | 0.77   | 0.70   | 0.61   | 0.69  | 0.72                            |
|                 | MB (kg/ha)     | 3.63   | -2.66  | -12.9  | -23.2 | -2.32                           |
|                 | NMB (%)        | 2.28   | -1.30  | -5.88  | -11.7 | -2.40%                          |
